# Supplementary material
Source: HighWire-hosted journal article supplement (https://bmjopen.bmj.com/content/13/9/e070893)
Supplement: inline-supplementary-material-6 [file inline-supplementary-material-6.pdf]

Table S2 IDI, and NRI of the nomogram and the FIGO stage in survival prediction for the advances endometrial carcinoma patients after surgical treatment.

| Index                           | Training cohort |             |         | Validation cohort |             |         |
|---------------------------------|-----------------|-------------|---------|-------------------|-------------|---------|
|                                 | Estimate        | 95% CI      | P-value | Estimate          | 95% CI      | P-value |
| <b>IDI (vs. the FIGO stage)</b> |                 |             |         |                   |             |         |
| For 1-year CSS                  | 0.062           | 0.047-0.084 | <0.001  | 0.071             | 0.046-0.111 | <0.001  |
| For 3-year CSS                  | 0.099           | 0.084-0.123 | <0.001  | 0.119             | 0.088-0.155 | <0.001  |
| For 5-year CSS                  | 0.112           | 0.095-0.133 | <0.001  | 0.138             | 0.103-0.174 | <0.001  |
| <b>NRI (vs. the FIGO stage)</b> |                 |             |         |                   |             |         |
| For 1-year CSS                  | 0.364           | 0.306-0.425 | <0.001  | 0.376             | 0.293-0.482 | <0.001  |
| For 3-year CSS                  | 0.354           | 0.308-0.395 | <0.001  | 0.352             | 0.302-0.421 | <0.001  |
| For 5-year CSS                  | 0.337           | 0.292-0.377 | <0.001  | 0.353             | 0.293-0.419 | <0.001  |
